# Supplementary material for: Surface expression, single-channel analysis and membrane topology of recombinant Chlamydia trachomatis Major Outer Membrane Protein
Source: PubMed Central journal article supplement (PMC549562; doi:10.1186/1471-2180-5-5), 2005-01-26

OG Triton Zwittergent LDAO  
NE NB B NB B NB B NB B

150

75

50

37

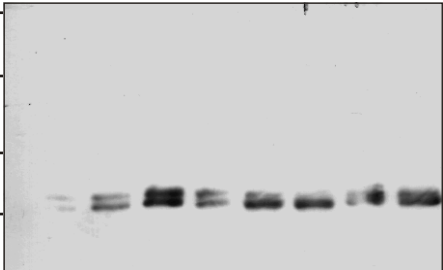

Supplement: 1471-2180-5-5-S1.pdf [file 1471-2180-5-5-S1.pdf]
