# Supplementary material for: Surface expression, single-channel analysis and membrane topology of recombinant Chlamydia trachomatis Major Outer Membrane Protein
Source: PubMed Central journal article supplement (PMC549562; doi:10.1186/1471-2180-5-5), 2005-01-26

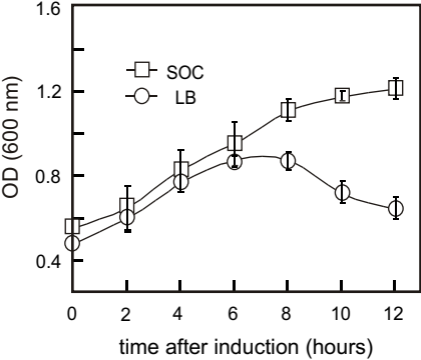

Supplement: 1471-2180-5-5-S2.pdf [file 1471-2180-5-5-S2.pdf]
